# Supplementary material
Source: PubMed Central journal article supplement (PMC2951255)

### Supplemental table 1:

The sequences of siRNA and shRNA used in the experiments.

| siRNA                | Target sequences       |
|----------------------|------------------------|
| NRP-1(h)             | ACGGTCATAGACAGCACCATA  |
| TGF- $\beta$ RII (h) | TCGGTTAATAACGACATGATA  |
| TGF- $\beta$ RI (h)  | AACAGCATGTGTATAGCTGAA  |
| shRNA                |                        |
| NRP-1 (h)            | CCCTGTTGGTTTCATTTGAATA |

### Supplemental table 2:

The sequences of primers used in the experiments.

| Primers                                   | Sequences                                                            | Product length (base pairs) |
|-------------------------------------------|----------------------------------------------------------------------|-----------------------------|
| $\beta$ -actin (both for human and mouse) | Forward: GAGACCTTCAACACCCCAGCC<br>Reverse: AATGTCACGCACGATTCCC       | 264                         |
| Mouse NRP-1                               | Forward: CATCCACAGCAATTCCACCAAGG<br>Reverse: GGACGTGTCTTGCTGCACAAATC | 94                          |
| Human TGF- $\beta$ RII                    | QT00014350 from Qiagen                                               | 108                         |
| Human TGF- $\beta$ RII                    | QT00083412 from Qiagen                                               | 107                         |

**Figure legends.**

**Supplemental Figure 1.** Comparison of the intracellular domain of human betaglycan, endoglin, and NRP-1. All of these proteins are well-known for not having any kinase domains but having a PDZ binding motif in the intracellular domain.

**Supplemental Figure 2.** Isolation of mouse HSC.  $\alpha$ -SMA immunostaining was used to confirm the HSCs after 7 days of isolation (A) and the huge upregulation of  $\alpha$ -SMA mRNA during the culture activation used for the positive control (B).

**Supplemental Figure 3.** TGF- $\beta$ 1 downregulated the NRP-1 level in LX2 cells. LX2 cells were serum-starved and treated with 10 ng/mL TGF- $\beta$ 1 for 24 and 48 hours.

**Supplemental Figure 4.** The reduced cell proliferation capacity of NRP-1 silenced cells is independent of TGF- $\beta$ -Smad signaling. LX2 cells were transfected with control and NRP-1 siRNA for 2 days in the present of 5  $\mu$ M SB431542, and cell proliferation was measured by [<sup>3</sup>H]-thymidine incorporation assay.

Supplemental Fig 1

Betaglycan: **lyshtgetagrqqvptsp-pas-enssaahsigstqstpcsssta**  
Endoglin: **lyshtrspskrepvvavaapassessstnhsigstqstpcstssma**  
NRP-1: **whngmsernlalenynfelvdgvklkkdklntqsty----sea**

PDZ binding motif

Supplemental Fig 2

A

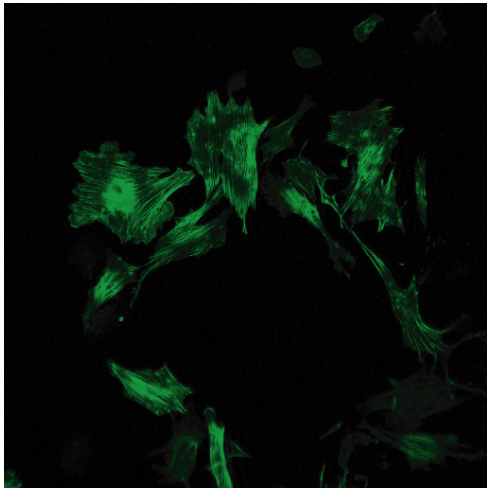

mouse hepatic stellate cell  
a-SMA staining

B

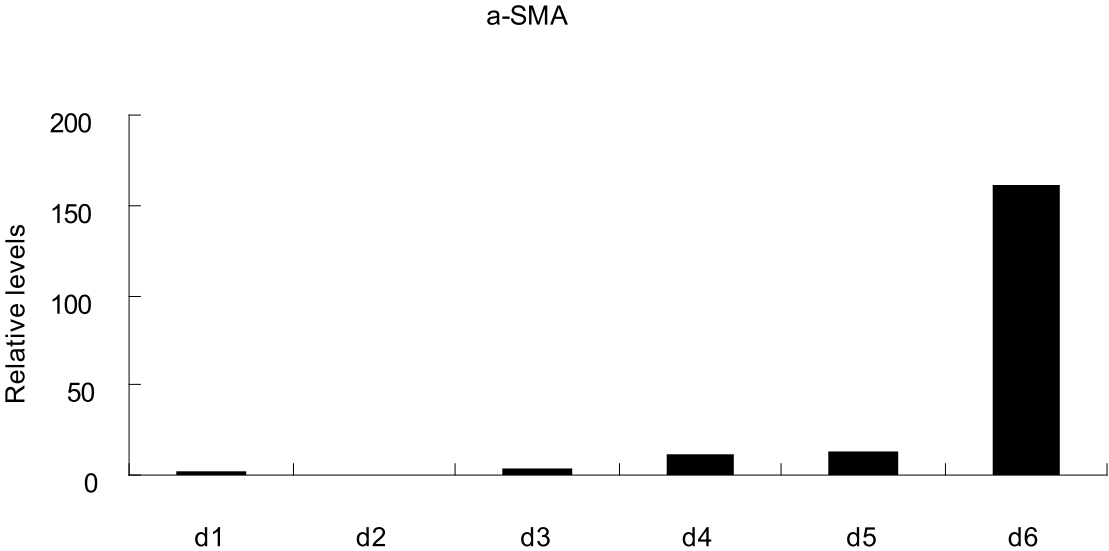

Supplemental Fig 3

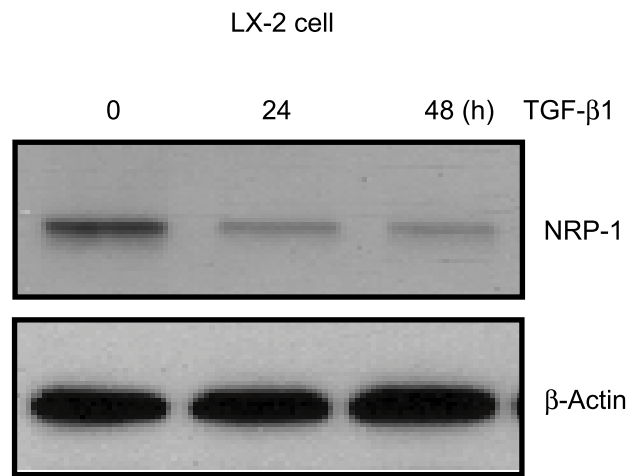

Supplemental Fig 4

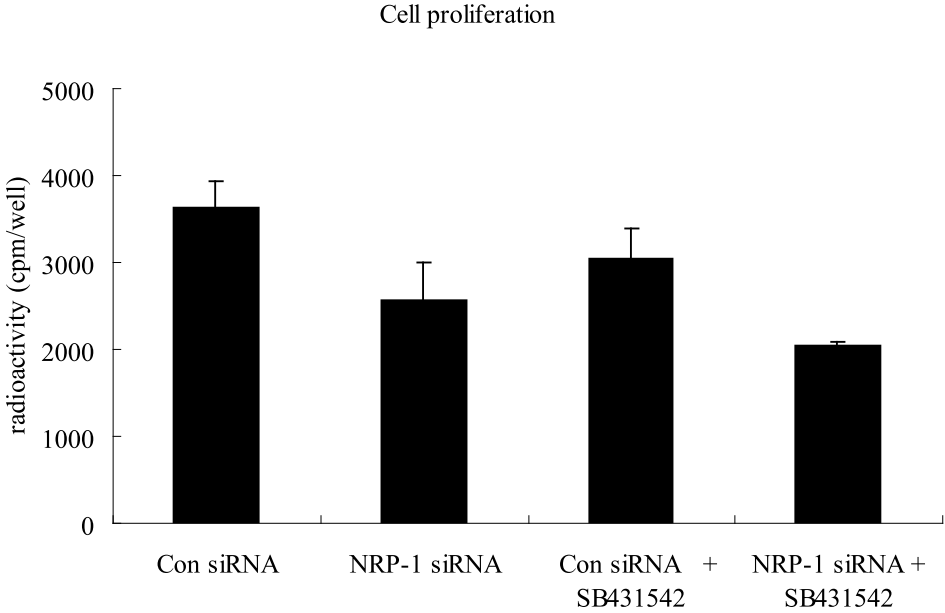

Supplement: supp_M110.151696_jbc.M110.151696-1.pdf [file supp_M110.151696_jbc.M110.151696-1.pdf]
